# Supplementary material
Source: PubMed Central journal article supplement (PMC4361230)
Supplement: NIHMS657900-supplement-Supplemental.pdf [file NIHMS657900-supplement-Supplemental.pdf]

## SUPPORTING INFORMATION

# Ru binding to RNA following treatment with the antimetastatic drug NAMI-A in *S. cerevisiae* and *in vitro*<sup>†</sup>

Alethia A. Hostetter,<sup>‡</sup> Michelle L. Miranda,<sup>‡,§</sup>  
Victoria J. DeRose,<sup>‡\*</sup> and Karen L. McFarlane Holman<sup>§\*</sup>

<sup>‡</sup>*Department of Chemistry, University of Oregon, Eugene, OR 97403, United States, and*

<sup>§</sup>*Department of Chemistry, Willamette University, 900 State Street, Salem, Oregon 97301, United States*

## CONTENTS

|                                                                                                                                                                                                     |    |
|-----------------------------------------------------------------------------------------------------------------------------------------------------------------------------------------------------|----|
| Figure S1:                                                                                                                                                                                          | S2 |
| (a) Yeast culture growth after 6 h of continuous NAMI-A treatment (b) differential interference contrast images of NAMI-A treated yeast at 6 h.                                                     |    |
| Figure S2:                                                                                                                                                                                          | S3 |
| Representative MALDI-TOF spectra of (a) DNA T <sub>6</sub> GGT <sub>5</sub> incubated with 150 μM NAMI-A for 6 and 24 h (b) DNA T <sub>6</sub> GGT <sub>5</sub> vs. A <sub>5</sub> CCA <sub>6</sub> |    |

**(a)**

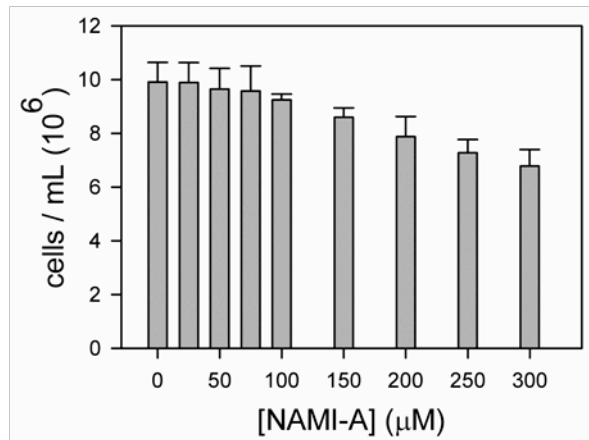

**(b)**

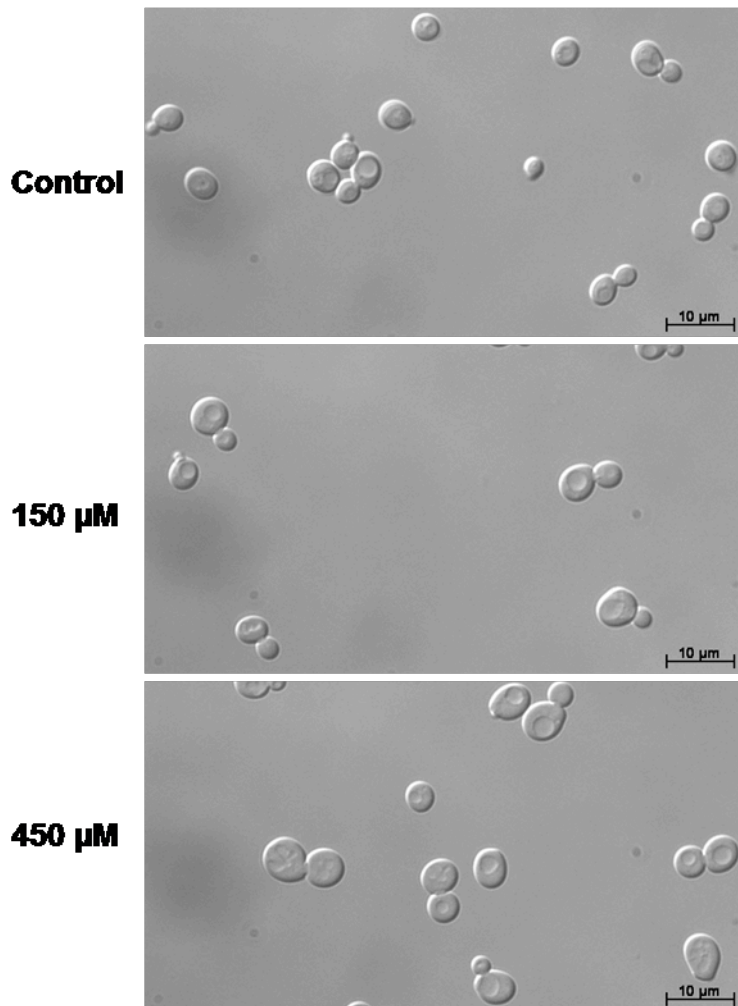

SI Figure 1: (a) Yeast culture growth after 6 h of continuous NAMI-A treatment. Results were averaged from three independent experiments presented as the means  $\pm$  SD. (b) Differential interference contrast image of NAMI-A treated yeast at 6 h.

Images were acquired on a Carl Zeiss Axioplan 2 fluorescence microscope using a 100× objective and AxioVision software (Carl Zeiss, Thornwood, NY).

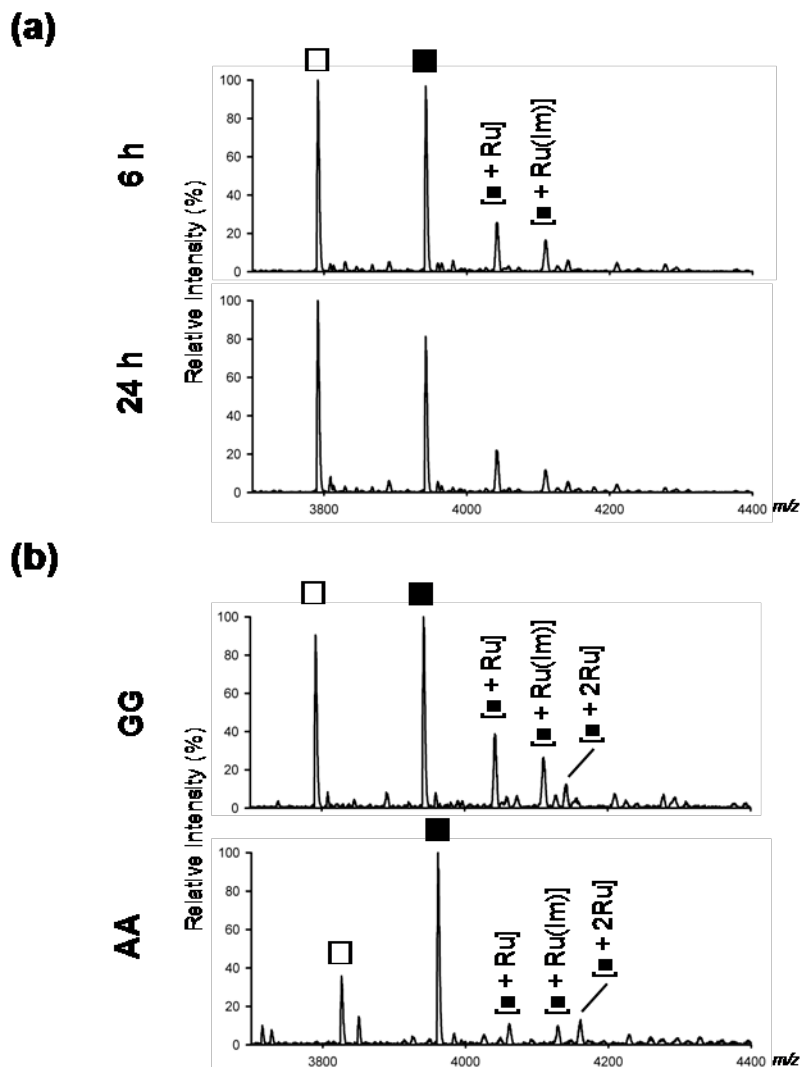

SI Figure 2: Representative MALDI-TOF spectra of the products of the incubation of NAMI-A with (a) DNA T<sub>6</sub>GGT<sub>5</sub> for 6 and 24 h in 150 μM NAMI-A and (b) DNA T<sub>6</sub>GGT<sub>5</sub> and A<sub>5</sub>CCA<sub>6</sub> for 6 h in 450 μM NAMI-A (comparison of GG and AA binding sites). Reactions were run with 20 μM oligonucleotides at pH 6.0 in 100 mM NaNO<sub>3</sub> and 2 mM Mg(NO<sub>3</sub>)<sub>2</sub> at 37 °C. Filled squares denote the unmodified, full-length T<sub>6</sub>GGT<sub>5</sub> and A<sub>5</sub>CCA<sub>6</sub> strands and open squares denote singly depurinated oligonucleotides strands.
